# Supplementary material for: Six-month outcomes after a GP phone call during the first French COVID-19 lockdown (COVIQuest): a cluster randomised trial using medico-administrative databases
Source: PubMed Central journal article supplement — BMJ Open. 2024 Nov 24;14(11):e085094. doi: 10.1136/bmjopen-2024-085094 (PMC11590837; doi:10.1136/bmjopen-2024-085094), 2024-11-24
Supplement: bmjopen-14-11-s001.pdf [file bmjopen-14-11-s001.pdf]

## Supplemental material

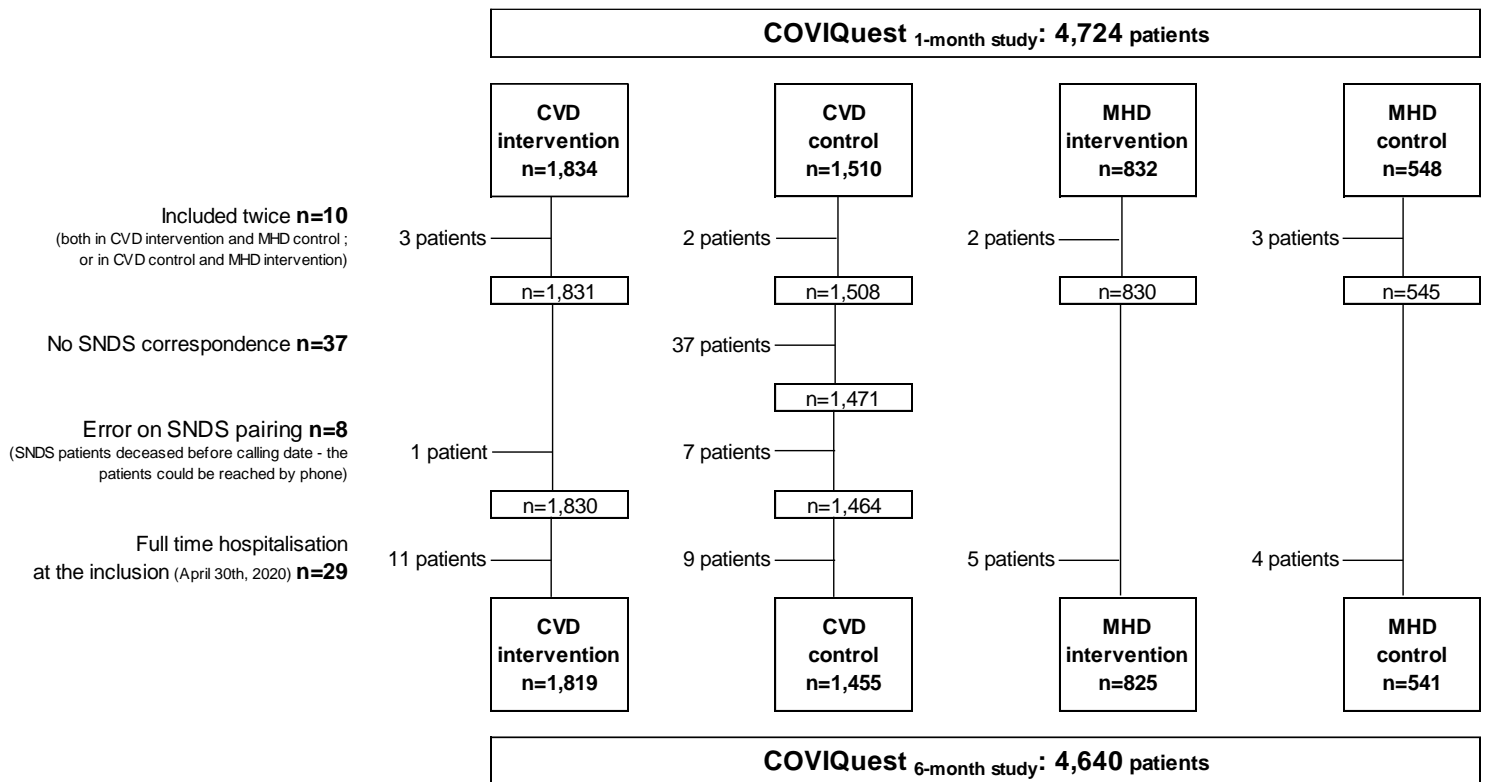

**Figure 1.** Flow-chart of COVIQuest\_CV and COVIQuest\_MH sub-trials. CVD, cardiovascular disease; MHD mental health disorder.

**Table 1.** Baseline characteristics of patients with chronic cardiovascular disease (CVD) or mental health disorder (MHD), by group: intervention and control. SD, standard deviation. IQR, inter-quartile range.

| Baseline characteristics of patients       | Intervention group<br>(phone call) | Control group               |
|--------------------------------------------|------------------------------------|-----------------------------|
| Patients with CVD, n                       | 1,819                              | 1,455                       |
| Age (years): mean $\pm$ s.d.; median [IQR] | 79.9 $\pm$ 6.9; 80 [74–85]         | 79.8 $\pm$ 7.2; 80 [74–85]  |
| Sex: male, n (%)                           | 1,047 (57.6)                       | 847 (58.2)                  |
| Patients with MHD, n                       | 825                                | 541                         |
| Age (years): mean $\pm$ s.d.; median [IQR] | 53.1 $\pm$ 14.2; 53 [44–63]        | 53.2 $\pm$ 16.0; 53 [41–64] |
| Sex: male, n(%)                            | 297 (36.0)                         | 202 (37.3)                  |

s.d., standard deviation; IQR, inter-quartile range

**Table 2.** Six-month hospitalisation details for patients with chronic cardiovascular disease (CVD) or mental health disease (MHD), by group: intervention and control.

| <b>Hospitalisation details</b> |                                                                       | <b>Intervention</b> | <b>Control</b> |
|--------------------------------|-----------------------------------------------------------------------|---------------------|----------------|
| <b>CVD</b>                     | Total number of patients                                              | 1,819               | 1,455          |
|                                | of which, patients with a least one hospitalisation at six months     | 315                 | 217            |
|                                | Time between inclusion and first hospitalisation (days): median [IQR] | 91 [51-146]         | 101 [47-143]   |
|                                | Duration of first hospitalisation (days): median [IQR]                | 4 [2-9]             | 4 [2-8]        |
| <b>MHD</b>                     | Total number of patients                                              | 825                 | 541            |
|                                | of which, patients with a least one hospitalisation at six months     | 119                 | 58             |
|                                | Time between inclusion and first hospitalisation (days): median [IQR] | 75 [35-124]         | 109 [62-144]   |
|                                | Duration of first hospitalisation (days): median [IQR]                | 5 [2-15]            | 5 [2-15]       |

IQR, inter-quartile range

**Table 3.** Six-months consultations with a specialised practitioner details for patients with chronic cardiovascular disease (CVD) or mental health disorder (MHD), by group: intervention and control.

| <b>Patients with at least one specialised practitioner consultation</b> |                                                                    | <b>Intervention</b> | <b>Control</b> |
|-------------------------------------------------------------------------|--------------------------------------------------------------------|---------------------|----------------|
|                                                                         | Patients, n                                                        | 447                 | 353            |
| <b>CVD</b>                                                              | Consultations per patient, median [IQR]                            | 1 [1-1]             | 1 [1-1]        |
|                                                                         | Time between inclusion and first consultation (days): median [IQR] | 77 [47-137]         | 83 [41-139]    |
|                                                                         | Patients, n                                                        | 219                 | 132            |
| <b>MHD</b>                                                              | Consultations per patient, median [IQR]                            | 4 [2-7]             | 4 [2-7]        |
|                                                                         | Time between inclusion and first consultation (days): median [IQR] | 25 [11-53]          | 22 [6-53]      |

IQR, inter-quartile range

**Table 4.** Six-months consultations with general practitioner (GP) details for patients with chronic cardiovascular disease (CVD) or mental health disease (MHD), by group: intervention and control.

| <b>Patients with at least one GP consultation</b> |                                                                    | <b>Intervention</b> | <b>Control</b> |
|---------------------------------------------------|--------------------------------------------------------------------|---------------------|----------------|
|                                                   | Patients, n                                                        | 1,789               | 1,411          |
| <b>CVD</b>                                        | Consultations per patient, median [IQR]                            | 3 [2-5]             | 3 [2-5]        |
|                                                   | Time between inclusion and first consultation (days): median [IQR] | 20 [11-43]          | 29 [13-50]     |
|                                                   | Patients, n                                                        | 745                 | 492            |
| <b>MHD</b>                                        | Consultations per patient, median [IQR]                            | 4 [2-6]             | 3 [2-6]        |
|                                                   | Time between inclusion and first consultation (days): median [IQR] | 20 [7-50]           | 30 [12-50]     |

IQR, inter-quartile range

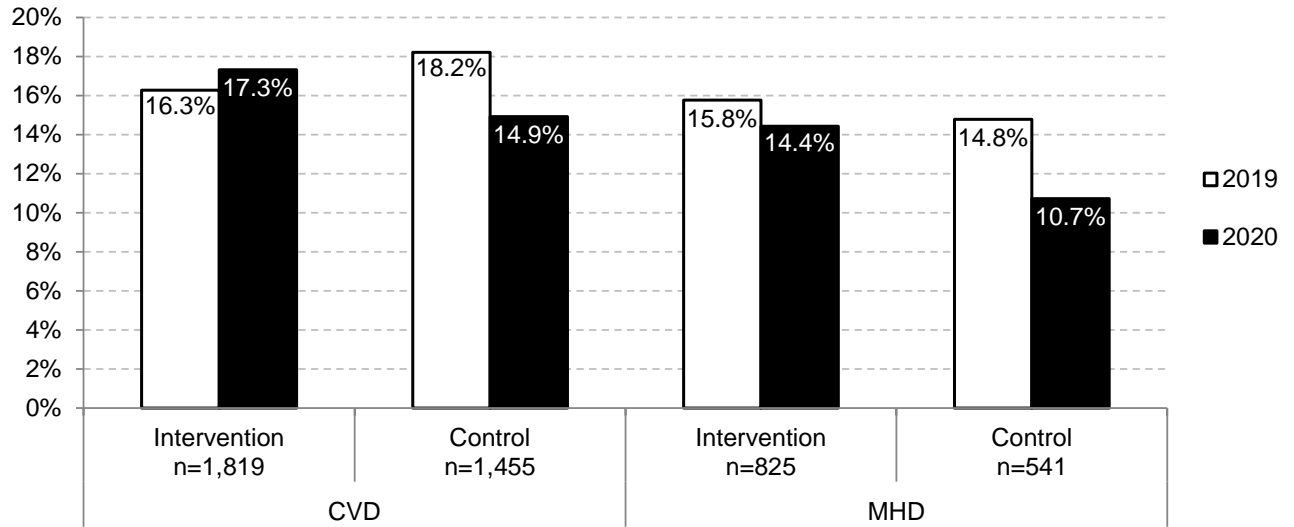

**Figure 2.** Proportions of patients with chronic cardiovascular disease (CVD) or mental health disorder (MHD) who had at least one hospitalisation within six months, 2019 versus 2020, by group: intervention and control.

**A.**

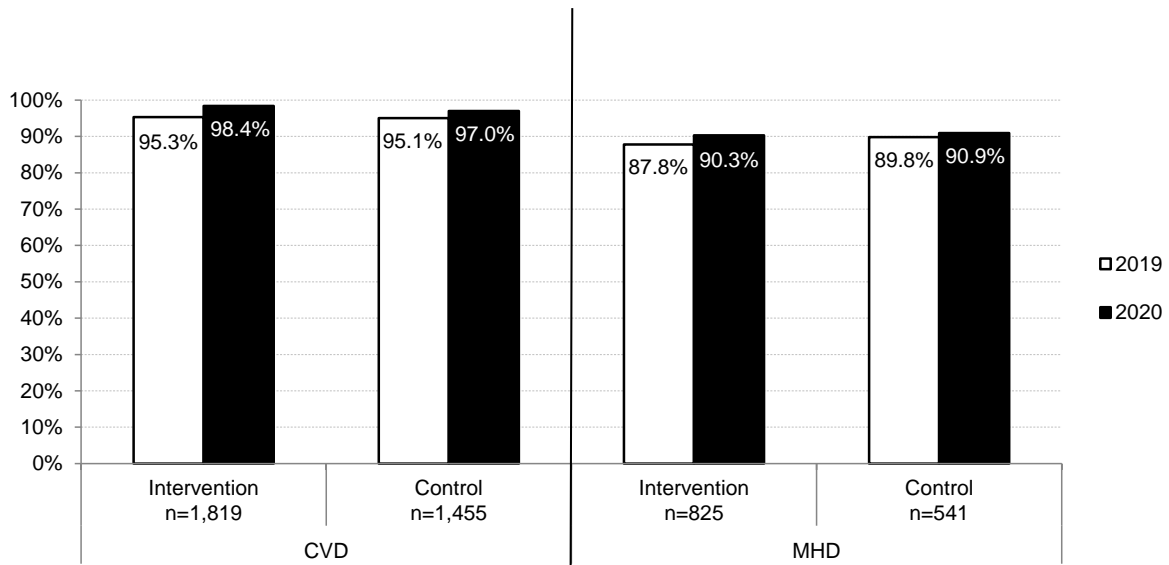

**B.**

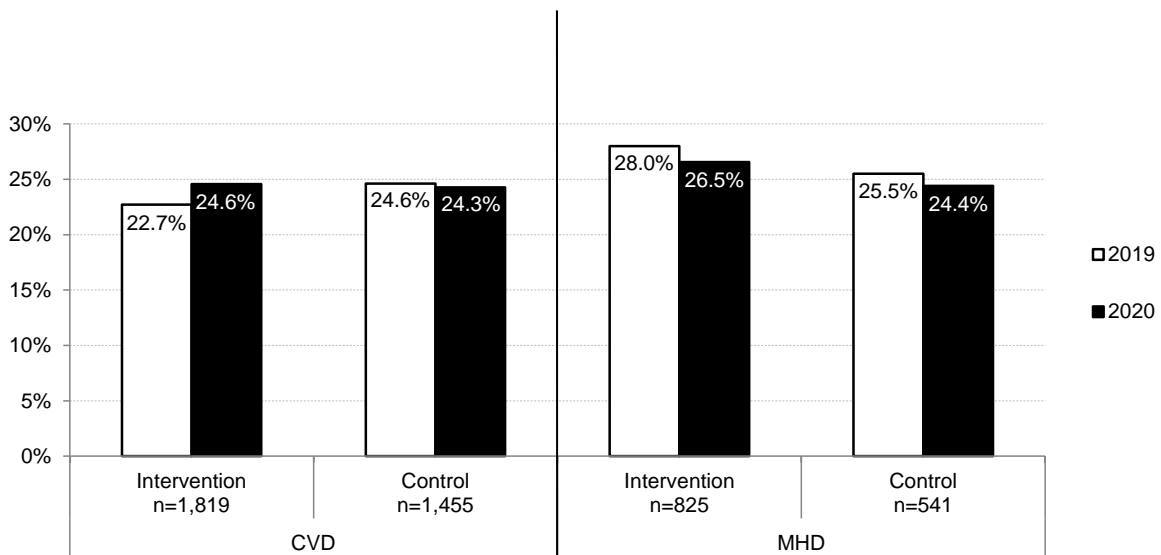

**Figure 3.** Proportions of patients with chronic cardiovascular disease (CVD) or mental health disorder (MHD) who had at least one consultation within the six months in 2019 versus 2020, by group: intervention and control, regarding **A.** general practitioner (GP) consultations; **B.** specialised practitioner consultations.

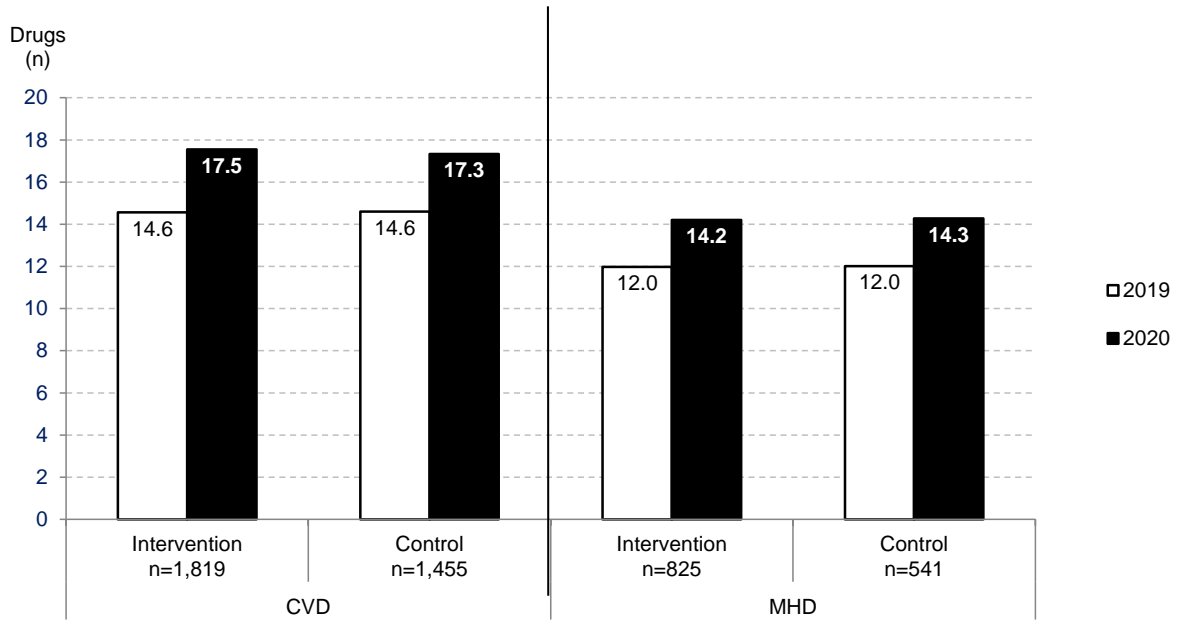

**Figure 4.** Mean numbers of treatments related to the chronic disease delivered by the pharmacy within six months, for patients with chronic cardiovascular disease (CVD) or mental health disease (MHD), 2019 versus 2020, by group: intervention and control.
